# Supplementary material for: Determination of Metal Content by Inductively Coupled Plasma-Mass Spectrometry in Polish Red and White Wine Samples in Relation to Their Type, Origin, Grape Variety and Health Risk Assessment
Source: MDPI journal article supplement (doi:10.3390/foods12173205), 2023-08-25
Supplement: s1 [file s1]

**Table S1.** Characterization of wine samples.

| No.* | Name              | Grape variety                                      | Aroma                                                     | Sweetness |
|------|-------------------|----------------------------------------------------|-----------------------------------------------------------|-----------|
| 1A   | Pinore XII        | Pinot noir                                         | Barrel notes, cherries, rowanberries, cranberries         | Dry       |
| 2B   | Cha-re XIII       | Chardonnay, Auxerrois                              | Tropical fruits, fruit trees                              | Dry       |
| 3B   | Cymbały           | Seyval Blanc                                       | Citrus fruits, tropical fruits                            | Dry       |
| 4B   | Cytryn            | Seyval Blanc, Sibera, Bianca                       | Citrus fruits, herbal notes, tropical fruits              | Dry       |
| 5A   | Koral             | Regent                                             | Fruit trees, forest fruits, red fruits, (black) pepper    | Dry       |
| 6A   | Magnesia Prestige | Cabernet Dorsa, Zweigelt, Rondo, Regent            | Forest fruits, red fruits, paprika, smoked plum, tobacco  | Dry       |
| 7B   | Passage Cuvee     | Riesling, Solaris, Johanniter                      | Fruit trees, tropical fruits, honey, flower notes         | Dry       |
| 8B   | Sibera            | Sibera                                             | Citrus notes, flower notes                                | Dry       |
| 9B   | Hibernal          | Hibernal                                           | Flower notes, tropical fruits, fruit trees                | Dry       |
| 10B  | Seyval Blanc      | Seyval Blanc                                       | Citrus notes, tropical fruits, fruit trees                | Semi-dry  |
| 11A  | Rondo             | Rondo                                              | Forest fruits, red fruits, chocolate                      | Dry       |
| 12A  | Geltrus XIV       | Zweigelt                                           | Forest fruits, red fruits                                 | Dry       |
| 13B  | Sey Sey XIV       | Seyval Blanc                                       | Tropical fruits, nettle leaf                              | Semi-dry  |
| 14B  | Lumini XIII       | Seyval Blanc, Sibera, Cserszegi Fuseresz, Traminer | Forest fruits, tropical fruits, citrus notes, nettle leaf | Dry       |
| 15B  | Daromini Blanc    | Seyval Blanc, Johaniter, Hibernal, Bianka, Sibera  | Citrus fruits, tropical fruits, forest fruits             | Dry       |
| 16B  | Hibia XIV         | Hibernal, Bianka, Traminer, Cserszegi Fiuszeres    | Tropical fruits, citrus notes, flower notes, acidity      | Dry       |
| 17B  | Parus A           | Riesling                                           | Sands, gravel, bog iron ore                               | Dry       |
| 18B  | Parus B           | Riesling                                           | Sands, gravel, bog iron ore                               | Semi-dry  |
| 19B  | Milvus            | Gewuertzttraminer                                  | Spicy                                                     | Dry       |
| 20A  | Regulus A         | Regent                                             | Fruits                                                    | Dry       |
| 21A  | Regulus B         | Regent                                             | Fruits                                                    | Dry       |

|     |                                      |                                                    |                                                                                                                                                                               |            |
|-----|--------------------------------------|----------------------------------------------------|-------------------------------------------------------------------------------------------------------------------------------------------------------------------------------|------------|
| 22A | Regent                               | Regent                                             | Red fruits, forest fruits, fruit trees, forest litter, compote of dried fruits                                                                                                | Dry        |
| 23A | Cabernet Cortis                      | Cabernet Cortis                                    | Tropical fruit, forest fruits, pepper, red paprika, barrel notes, leather, tobacco, red fruits, fruit trees                                                                   | Dry        |
| 24A | Rondo                                | Rondo                                              | Red fruits, forrest fruits                                                                                                                                                    | Dry        |
| 25B | Cuvée<br>Vineyard Srebrna Góra       | Johanniter, Hiberna,<br>Gewürztraminer, Solaris    | Citrus notes, fruit trees, flower notes, tropical fruits, acidity                                                                                                             | Dry        |
| 26A | Pinot Noir                           | Pinot Noir                                         | Red fruits, spicy notes, acidity                                                                                                                                              | Dry        |
| 27B | Riesling                             | Riesling                                           | Citrus notes, honey, raisins                                                                                                                                                  | Dry        |
| 28B | Chardonnay                           | Chardonnay                                         | Fruits                                                                                                                                                                        | Dry        |
| 29A | Pinot Noir                           | Pinot Noir                                         | Elderberry, herbal, red fruits, barrel notes                                                                                                                                  | Dry        |
| 30A | Cabernet                             | Cabernet Cortis                                    | Red fruits, fresh pepper, cacao, dark chocolate                                                                                                                               | Dry        |
| 31B | Solaris                              | Solaris                                            | Tropical fruits, fruit trees, gooseberry                                                                                                                                      | Semi-dry   |
| 32A | Rondo/Reget                          | Rondo, Regent                                      | Chocolate, forest fruits, paprika                                                                                                                                             | Dry        |
| 1-A | Vineyard “Zamojska<br>Wiśnia”        | Cherries                                           | Cherries, pit notes                                                                                                                                                           | Semi-sweet |
| 2-B | Vineyard “Zamojska<br>Gruszka”       | Pears                                              | Pear, honey, apricot                                                                                                                                                          | Semi-sweet |
| 3-B | Ice wine Vineyard<br>Zamojska        | Apples                                             | Candied orange peel, raisins, spices, baked apple                                                                                                                             | Sweet      |
| 4-A | Cuvee Rouge<br>Vineyard Srebrne      | blend of Regent, Rondo,<br>Acolon, Cabernet Cortis | Raspberries, cherries, strawberries, plums, blackberries, bilberries, smoky notes                                                                                             | Dry        |
| 5-A | Cuvee Rouge Vineyard<br>Srebrna Góra | Regent, Rondo, Acolon                              | Rasperries, strawberries, cherries, blackberries, bilberries, cherry with pit, dried plums, smoke, forest                                                                     | Dry        |
| 6-A | Vineyard Zamojska                    | Black Currant                                      | Black currant, blackberries                                                                                                                                                   | Sweet      |
| 7-B | Cuvee Blanc<br>Vineyard Srebrna Góra | Seyval Blanc, Johanniter,<br>Hiberna, Solaris      | Citrus, peaches, apricots, gooseberry, white currant, apples, pears, greengages, tangerines, bananas, pineapples, mango, passion fruits, flower notes, muscat, cassis, pepper | Semi-dry   |
| 8-B | Riesling<br>Vineyard Srebrna Góra    | Riesling                                           | Apples, pears, white plums, citrus, herbal notes, spicy notes, hay, wax, butter notes, toasted notes                                                                          | Dry        |
| 9-B | Chardonnay<br>Vineyard Srebrna Góra  | Chardonnay, Auxerrois                              | Flowers, bread, fresh apples, pears, wax, musk, vanilla, oak                                                                                                                  | Dry        |

|      |                                       |                                                               |                                                                                                                        |            |
|------|---------------------------------------|---------------------------------------------------------------|------------------------------------------------------------------------------------------------------------------------|------------|
| 10-B | Cuvee Blanc. Vineyard Srebne          | Johanniter, Hiberna, Gewurztraminer, Solaris                  | White peaches, apricots, apples, pears, white roses, field flowers, pineapples, mango, lychees, gooseberry, tangerines | Dry        |
| 11-B | Cuvee Blanc Vineyard Póltorak         | Seyval Blanc, Johanniter, Solaris, Sauvignier Gris, Jutrzenka | Citrus, flowers, honey                                                                                                 | Dry        |
| 12-B | Equus "Piaf" Cuvee Blanc              | Chardonnay, Solaris, Riesling                                 | Peaches, melons, pears, pineapples, apple jam, honey, acacia flowers                                                   | Semi-dry   |
| 13-A | Cuvee Rouge. Vineyard Póltorak        | Rondo, Regent, Leon Millot, Salomea                           | Red fruits, spicy notes, black pepper                                                                                  | Dry        |
| 14-A | Equus "Vineyard Adorator"             | Zweigelt, Rondo, Regent, Cabernet Cortis                      | Black currant, blackberries, cherries, paprika, smoked plums, tobacco                                                  | Dry        |
| 15-A | Cabernet Cortis Vineyard Niemczańska  | Cabernet Cortis                                               | Black lilac, pepper, smoked plums                                                                                      | Dry        |
| 16-B | Chardonnay Vineyard Niemczańska       | Chardonnay                                                    | Pineapples, green apples, butter                                                                                       | Dry        |
| 17-B | Pinot Gris Vineyard Niemczańska       | Pinot Gris                                                    | Apricots, honey, bee wax                                                                                               | Semi-sweet |
| 18-A | Pinot Noir Vineyard Niemczańska       | Pinot Noir                                                    | Cherries, jam, oak                                                                                                     | Dry        |
| 19-B | Riesling Vineyard Niemczańska         | Riesling                                                      | Green apples, citrus, quinces                                                                                          | Dry        |
| 20-B | Vincent Laura Vineyard Saint          | Gewürztraminer                                                | Roses, apricots                                                                                                        | Semi-dry   |
| 21-B | Solaris-Riesling Vineyard Niemczańska | Solaris, Riesling                                             | Mango, peaches, pineapples, pears, citrus, acidity                                                                     | Semi-sweet |

\* A – red wine, B – white wine.

**Table S2.** Calibration curve parameters, LOD and LOQ values of ICP-MS/ICP-OES analytical techniques.

| Element | Mass       | r       | LOD (3s) | LOQ (10s) |
|---------|------------|---------|----------|-----------|
| Ag      | 107        | 0.99995 | 0.001    | 0.004     |
| Al      | 27         | 0.99985 | 0.957    | 3.191     |
| As      | 75         | 0.99996 | 0.005    | 0.017     |
| B       | 11         | 0.99978 | 16.75    | 55.86     |
| Ba      | 138        | 0.99995 | 0.003    | 0.011     |
| Be      | 9          | 0.99977 | 0.0008   | 0.0026    |
| Bi      | 209        | 0.99545 | 0.006    | 0.022     |
| Cd      | 111        | 0.99668 | 0.0006   | 0.002     |
| Co      | 59         | 0.99952 | 0.0009   | 0.003     |
| Cr      | 52         | 0.99999 | 0.045    | 0.151     |
| Cu      | 63         | 0.99923 | 0.198    | 0.660     |
| Fe      | 56         | 0.99929 | 0.041    | 0.135     |
| Hg      | 202        | 0.99058 | 0.0001   | 0.0004    |
| Li      | 7          | 0.99978 | 0.0357   | 0.119     |
| Mn      | 55         | 0.99896 | 0.002    | 0.007     |
| Mo      | 95         | 0.99948 | 0.0008   | 0.003     |
| Mo      | 98         | 0.99947 | 0.0008   | 0.003     |
| Ni      | 60         | 0.99958 | 0.008    | 0.029     |
| Pb      | 208        | 0.99999 | 0.002    | 0.008     |
| Sb      | 121        | 0.99941 | 0.002    | 0.007     |
| Se      | 78         | 0.99999 | 0.009    | 0.031     |
| Sr      | 88         | 0.99889 | 0.006    | 0.021     |
| Ti      | 49         | 0.99881 | 0.027    | 0.089     |
| V       | 51         | 0.99987 | 0.002    | 0.007     |
| Zn      | 66         | 0.99965 | 0.033    | 0.111     |
| Zr      | 90         | 0.99964 | 0.003    | 0.010     |
| Element | Wavelength | r       | LOD (3s) | LOQ (10s) |
| Ca      | 396.8 nm   | 0.99992 | 0.234    | 0.780     |
| Mg      | 383.2 nm   | 0.99963 | 3.870    | 12.90     |
| K       | 404.7 nm   | 0.99918 | 73.47    | 244.9     |
| Na      | 589.6 nm   | 0.99909 | 0.286    | 0.952     |

LOD and LOQ are in  $\mu\text{g}\cdot\text{l}^{-1}$ .

**Table S3.** Summary of data for all investigated elements according to the type of wine.

| Element | Unit                            | Red wine (N = 22) |       |        | White wine (N = 31) |       |        |
|---------|---------------------------------|-------------------|-------|--------|---------------------|-------|--------|
|         |                                 | Range             | Mean  | Median | Range               | Mean  | Median |
| Al      | $\mu\text{g}\cdot\text{l}^{-1}$ | 114.0 – 3430      | 411.9 | 208.0  | 52.00 – 3150        | 821.7 | 524.0  |
| As      | $\mu\text{g}\cdot\text{l}^{-1}$ | 0.435 – 5.410     | 2.168 | 1.640  | 0.542 – 13.40       | 4.284 | 3.620  |
| B       | $\mu\text{g}\cdot\text{l}^{-1}$ | 1870 – 9080       | 3855  | 2580   | 1400 – 8550         | 3866  | 2570   |
| Ba      | $\mu\text{g}\cdot\text{l}^{-1}$ | 52.70 – 348.0     | 163.3 | 140.0  | 31.00 – 318.0       | 127.5 | 102.0  |
| Be      | $\mu\text{g}\cdot\text{l}^{-1}$ | 0.0088 – 0.168    | 0.088 | 0.088  | 0.054 – 5.190       | 2.043 | 0.683  |
| Cd      | $\mu\text{g}\cdot\text{l}^{-1}$ | 0.085 – 6.310     | 0.933 | 0.579  | 0.150 – 2.070       | 0.727 | 0.657  |
| Co      | $\mu\text{g}\cdot\text{l}^{-1}$ | 0.685 – 8.170     | 2.351 | 1.775  | 0.957 – 11.70       | 3.616 | 3.180  |
| Cr      | $\mu\text{g}\cdot\text{l}^{-1}$ | 3.310 – 74.20     | 15.71 | 11.70  | 2.480 – 53.20       | 13.94 | 10.80  |
| Cu      | $\mu\text{g}\cdot\text{l}^{-1}$ | 1.980 – 169.0     | 48.02 | 29.30  | 10.00 – 585.0       | 110.4 | 60.10  |
| Fe      | $\mu\text{g}\cdot\text{l}^{-1}$ | 449.0 – 5170      | 1329  | 921.0  | 399.0 – 4870        | 1784  | 1260   |
| Hg      | $\mu\text{g}\cdot\text{l}^{-1}$ | 0.039 – 0.140     | 0.069 | 0.062  | 0.035 – 0.134       | 0.075 | 0.064  |
| Li      | $\mu\text{g}\cdot\text{l}^{-1}$ | 0.357 – 10.70     | 1.961 | 0.969  | 0.939 – 7.300       | 3.239 | 3.070  |
| Mn      | $\mu\text{g}\cdot\text{l}^{-1}$ | 774.0 – 3550      | 1832  | 1685   | 522.0 – 2940        | 1433  | 1430   |
| Ni      | $\mu\text{g}\cdot\text{l}^{-1}$ | 17.20 – 120.0     | 41.54 | 38.25  | 12.90 – 296.0       | 51.62 | 30.20  |
| Pb      | $\mu\text{g}\cdot\text{l}^{-1}$ | 3.330 – 16.60     | 9.443 | 8.945  | 3.310 – 30.00       | 14.17 | 12.90  |
| Sb      | $\mu\text{g}\cdot\text{l}^{-1}$ | 0.155 – 2.440     | 0.459 | 0.311  | 0.223 – 3.000       | 0.737 | 0.625  |
| Se      | $\mu\text{g}\cdot\text{l}^{-1}$ | 0.007 – 1.630     | 0.448 | 0.392  | 0.039 – 1.080       | 0.407 | 0.415  |
| Sr      | $\mu\text{g}\cdot\text{l}^{-1}$ | 187.0 – 983.0     | 495.4 | 479.5  | 107.0 – 720.0       | 362.3 | 317.0  |
| Ti      | $\mu\text{g}\cdot\text{l}^{-1}$ | 4.090 – 198.0     | 76.22 | 83.00  | 2.790 – 416.0       | 119.5 | 112.0  |
| V       | $\mu\text{g}\cdot\text{l}^{-1}$ | 0.160 – 76.20     | 11.19 | 4.170  | 0.234 – 166.0       | 25.98 | 8.360  |
| Zn      | $\mu\text{g}\cdot\text{l}^{-1}$ | 123.0 – 1930      | 606.8 | 512.5  | 74.80 – 2000        | 674.7 | 666.0  |
| Zr      | $\mu\text{g}\cdot\text{l}^{-1}$ | 1.030 – 308.0     | 39.75 | 9.805  | 0.674 – 354.0       | 68.57 | 39.25  |
| Ca      | $\text{mg}\cdot\text{l}^{-1}$   | 3.380 – 144.0     | 58.19 | 66.70  | 2.210 – 273.0       | 76.50 | 73.90  |
| K       | $\text{mg}\cdot\text{l}^{-1}$   | 1010 – 2320       | 1521  | 1440   | 120.0 – 3310        | 1160  | 1140   |
| Mg      | $\text{mg}\cdot\text{l}^{-1}$   | 46.60 – 126.0     | 81.23 | 80.00  | 43.00 – 450.0       | 86.40 | 69.50  |
| Na      | $\text{mg}\cdot\text{l}^{-1}$   | 8.320 – 122.0     | 33.12 | 12.60  | 10.10 – 151.0       | 39.71 | 22.40  |

**Table S4.** Minimum and maximum concentrations of elements, mean and median of determined concentrations, analyzed in wine samples depending on their origin – voivodeship.

| Voivodeship       |                    | Lower Silesian                                     | Subcarpathian                 | Silesian                      | Lubusz                        | Lesser Poland                 | Świętokrzyskie (Holy Cross)   | West Pomeranian               | Lublin                        |
|-------------------|--------------------|----------------------------------------------------|-------------------------------|-------------------------------|-------------------------------|-------------------------------|-------------------------------|-------------------------------|-------------------------------|
| Number of samples |                    | 16                                                 | 3                             | 3                             | 5                             | 14                            | 5                             | 3                             | 4                             |
| Element           | Unit               | Concentration<br>Minimum – maximum<br>Mean; median |                               |                               |                               |                               |                               |                               |                               |
| Al                | µg·l <sup>-1</sup> | 131.0 – 1490<br>556.7; 337.5                       | 132.0 – 405.0<br>300.7; 365.0 | 52.00 – 125.0<br>97.00; 114.0 | 215.0 – 595.0<br>346.8; 255.0 | 136.0 – 2640<br>858.4; 601.5  | 201.0 – 487.0<br>395.8; 412.0 | 158.0 – 362.0<br>234.0; 182.0 | 511.0 – 3430<br>2001; 2031    |
| As                | µg·l <sup>-1</sup> | 1.370 – 13.40<br>4.156; 3.705                      | 0.589 – 4.710<br>2.523; 2.270 | 0.542 – 0.653<br>0.583; 0.553 | 0.828 – 4.260<br>2.273; 2.240 | 0.435 – 12.00<br>4.027; 3.715 | 1.910 – 2.810<br>2.362; 2.340 | 1.100 – 2.660<br>1.720; 1.400 | 2.630 – 9.470<br>4.990; 3.930 |
| B                 | µg·l <sup>-1</sup> | 1920 – 8020<br>4196; 3130                          | 1400 – 8290<br>5293; 6190     | 1670 – 2420<br>2057; 2080     | 2520 – 9080<br>5348; 5500     | 1990 – 6500<br>3896; 3195     | 1900 – 2730<br>2304; 2260     | 2270 – 2640<br>2403; 2300     | 1560 – 8550<br>3870; 2685     |
| Ba                | µg·l <sup>-1</sup> | 43.20 – 348.0<br>161.3; 124.5                      | 56.10 – 109.0<br>86.43; 94.20 | 31.00 – 253.0<br>127.3; 97.80 | 45.40 – 228.0<br>114.0; 105.0 | 66.40 – 238.0<br>145.3; 137.0 | 52.70 – 102.0<br>78.76; 80.60 | 130.0 – 207.0<br>178.7; 199.0 | 86.90 – 318.0<br>197.3; 192.1 |
| Be                | µg·l <sup>-1</sup> | 0.054 – 4.590<br>1.932; 0.310                      | 0.515                         | NA                            | NA                            | 3.260 – 5.190<br>4.343; 4.580 | 0.183 – 0.683<br>0.487; 0.542 | 0.009 – 1.570<br>0.789; 0.789 | NA                            |
| Cd                | µg·l <sup>-1</sup> | 0.150 – 0.777<br>0.463; 0.472                      | 0.241 – 0.703<br>0.412; 0.291 | 1.250 – 2.070<br>1.600; 1.480 | 0.085 – 0.728<br>0.279; 0.196 | 0.156 – 6.310<br>1.333; 0.813 | 0.178 – 1.630<br>0.941; 0.960 | 0.110 – 0.329<br>0.196; 0.148 | 0.603 – 1.160<br>0.829; 0.776 |
| Co                | µg·l <sup>-1</sup> | 0.779 – 4.900<br>2.661; 2.545                      | 0.957 – 3.890<br>2.242; 1.880 | 1.870 – 2.600<br>2.207; 2.150 | 1.330 – 2.330<br>1.888; 1.900 | 0.685 – 11.70<br>4.274; 2.990 | 0.990 – 4.130<br>3.238; 3.590 | 1.660 – 2.560<br>1.963; 1.670 | 2.870 – 5.400<br>4.135; 4.135 |
| Cr                | µg·l <sup>-1</sup> | 7.130 – 53.20<br>16.18; 12.15                      | 8.770 – 17.50<br>14.09; 16.00 | 2.480 – 16.30<br>9.727; 10.40 | 6.570 – 13.10<br>9.988; 10.00 | 3.310 – 16.70<br>10.78; 10.10 | 5.330 – 13.70<br>9.680; 8.800 | 15.20 – 20.50<br>17.07; 15.50 | 9.950 – 74.20<br>36.79; 31.50 |
| Cu                | µg·l <sup>-1</sup> | 1.980 – 169.0<br>43.82; 25.95                      | 94.10 – 169.0<br>131.5; 131.5 | 15.00 – 28.00<br>21.00; 20.00 | 16.00 – 555.0<br>142.8; 57.00 | 8.000 – 585.0<br>98.65; 40.00 | 42.00 – 126.0<br>90.20; 98.00 | 44.00 – 342.0<br>148.7; 60.00 | 60.10                         |
| Fe                | µg·l <sup>-1</sup> | 399.0 – 1370<br>907.1; 852.0                       | 729.0 – 905.0<br>843.0; 895.0 | 493.0 – 3640<br>1687; 927.0   | 1080 – 2040<br>1566; 1740     | 449.0 – 2390<br>1460; 1410    | 2230 – 4410<br>3450; 3650     | 464.0 – 915.0<br>752.0; 877.0 | 1960 – 5170<br>3670; 3775     |
| Hg                | µg·l <sup>-1</sup> | 0.041 – 0.056<br>0.050; 0.051                      | 0.066 – 0.090<br>0.078; 0.078 | NA                            | 0.045 – 0.066<br>0.058; 0.064 | 0.035 – 0.124<br>0.078; 0.085 | NA                            | NA                            | 0.057 – 0.140<br>0.107; 0.115 |
| Li                | µg·l <sup>-1</sup> | 0.918 – 10.70<br>4.123; 3.620                      | 1.280                         | 0.939 – 3.250<br>2.073; 2.030 | 0.879 – 2.580<br>1.730; 1.730 | 0.357 – 4.260<br>1.546; 0.947 | 0.832 – 4.600<br>3.000; 3.110 | 1.020 – 3.820<br>2.070; 1.370 | NA                            |
| Mn                | µg·l <sup>-1</sup> | 700.0 – 3550<br>1743; 1560                         | 1090 – 2110<br>1723; 1970     | 670.0 – 1640<br>1050; 841.0   | 603.0 – 2280<br>1258; 1030    | 999.0 – 2940<br>1843; 1915    | 1060 – 1660<br>1336; 1390     | 1430 – 1790<br>1597; 1570     | 522.0 – 2160<br>1241; 1142    |

|    |                                 |                               |                               |                               |                               |                               |                               |                               |                                |
|----|---------------------------------|-------------------------------|-------------------------------|-------------------------------|-------------------------------|-------------------------------|-------------------------------|-------------------------------|--------------------------------|
| Ni | $\mu\text{g}\cdot\text{l}^{-1}$ | 25.60 – 296.0<br>71.46; 49.30 | 52.20 – 78.10<br>62.27; 56.50 | 12.90 – 120.0<br>54.10; 29.40 | 21.50 – 45.40<br>29.90; 25.40 | 17.20 – 63.60<br>30.91; 25.15 | 23.10 – 29.60<br>26.84; 26.90 | 33.70 – 41.90<br>37.10; 35.70 | 30.20 – 85.10<br>48.50; 39.35  |
| Pb | $\mu\text{g}\cdot\text{l}^{-1}$ | 3.310 – 19.80<br>12.30; 11.30 | 6.340 – 10.90<br>7.973; 6.680 | 7.280 – 16.40<br>11.79; 11.70 | 4.380 – 14.40<br>11.09; 12.90 | 3.330 – 16.50<br>10.75; 10.41 | 14.00 – 26.70<br>21.56; 21.60 | 7.900 – 9.340<br>8.690; 8.830 | 6.800 – 30.00<br>12.82; 7.240  |
| Sb | $\mu\text{g}\cdot\text{l}^{-1}$ | 0.217 – 1.490<br>0.590; 0.476 | 0.440 – 0.633<br>0.527; 0.509 | 0.223 – 0.381<br>0.305; 0.310 | 0.155 – 0.511<br>0.375; 0.388 | 0.226 – 0.951<br>0.553; 0.601 | 0.195 – 0.558<br>0.392; 0.381 | 0.282 – 0.743<br>0.449; 0.321 | 1.210 – 3.000<br>2.023; 1.940  |
| Se | $\mu\text{g}\cdot\text{l}^{-1}$ | 0.097 – 0.508<br>0.325; 0.367 | 0.427 – 0.491<br>0.459; 0.459 | 0.114                         | 0.472 – 1.630<br>1.061; 1.080 | 0.018 – 1.260<br>0.476; 0.532 | 0.131 – 0.369<br>0.214; 0.178 | 0.007 – 0.084<br>0.046; 0.046 | 0.450 – 0.786<br>0.588 ; 0.557 |
| Sr | $\mu\text{g}\cdot\text{l}^{-1}$ | 164.0 – 983.0<br>466.8; 444.0 | 314.0 – 483.0<br>371.3; 317.0 | 245.0 – 684.0<br>431.0; 364.0 | 107.0 – 596.0<br>397.2; 385.0 | 216.0 – 720.0<br>425.0; 426.5 | 187.0 – 465.0<br>288.2; 260.0 | 389.0 – 508.0<br>442.0; 429.0 | 182.0 – 681.0<br>388.0; 344.5  |
| Ti | $\mu\text{g}\cdot\text{l}^{-1}$ | 2.790 – 280.0<br>113.3; 93.50 | 4.740 – 100.0<br>37.13; 6.640 | 112.0 – 136.0<br>124.0; 124.0 | 4.750 – 173.0<br>60.21; 6.310 | 4.990 – 416.0<br>99.52; 82.50 | 106.0 – 234.0<br>190.0; 203.0 | 86.00 – 102.0<br>91.67; 87.00 | 18.30 – 77.70<br>41.65; 35.30  |
| V  | $\mu\text{g}\cdot\text{l}^{-1}$ | 2.910 – 166.0<br>27.56; 8.010 | 1.690 – 8.360<br>4.740; 4.170 | 0.232 – 1.170<br>0.545; 0.234 | 0.160 – 10.90<br>4.428; 4.550 | 0.260 – 36.70<br>14.83; 13.60 | 1.150 – 7.470<br>3.618; 2.890 | 1.240 – 4.290<br>2.660; 2.450 | 36.60 – 163.0<br>85.62; 71.45  |
| Zn | $\mu\text{g}\cdot\text{l}^{-1}$ | 370.0 – 969.0<br>678.6; 669.0 | 221.0 – 584.0<br>450.3; 546.0 | 390.0 – 2000<br>948.3; 455.0  | 373.0 – 814.0<br>511.2; 466.0 | 123.0 – 1930<br>724.1; 666.0  | 300.00 – 1000<br>627.0; 699.0 | 384.0 – 1080<br>740.3; 757.0  | 74.80 – 479.0<br>290.4; 304.0  |
| Zr | $\mu\text{g}\cdot\text{l}^{-1}$ | 0.674 – 45.80<br>17.39; 10.90 | 12.60 – 36.20<br>21.20; 14.80 | NA                            | 10.10 – 19.20<br>13.83; 12.20 | 3.220 – 354.0<br>97.71; 46.50 | 1.030 – 67.00<br>41.79; 41.30 | 1.290 – 3.900<br>2.493; 2.290 | 118.0 – 308.0<br>208.0; 203.0  |
| Ca | $\text{mg}\cdot\text{l}^{-1}$   | 2.290 – 170.0<br>67.68; 65.05 | 2.810 – 73.90<br>26.82; 3.750 | 86.50 – 102.0<br>94.60; 95.30 | 2.480 – 129.0<br>44.27; 3.380 | 3.490 – 273.0<br>70.55; 65.50 | 78.00 – 163.0<br>133.8; 141.0 | 64.70 – 83.30<br>71.80; 67.40 | 2.210 – 57.00<br>27.79; 25.98  |
| K  | $\text{mg}\cdot\text{l}^{-1}$   | 120.0 – 1880<br>1154; 1225    | 664.0 – 1300<br>975.7; 963.0  | 998.0 – 1330<br>1123; 1040    | 768.0 – 1450<br>1098; 1030    | 927.0 – 2280<br>1437; 1315    | 1010 – 1740<br>1356; 1420     | 598.0 – 2320<br>1476; 1510    | 1380 – 3310<br>1965; 1585      |
| Mg | $\text{mg}\cdot\text{l}^{-1}$   | 43.90 – 126.0<br>76.64; 79.95 | 44.60 – 111.0<br>81.83; 89.90 | 54.10 – 450.0<br>195.5; 82.30 | 60.60 – 128.0<br>93.92; 101.0 | 43.00 – 117.0<br>78.95; 84.15 | 48.90 – 69.50<br>56.66; 52.20 | 59.10 – 80.90<br>67.30; 61.90 | 49.20 – 134.0<br>86.85; 82.10  |
| Na | $\text{mg}\cdot\text{l}^{-1}$   | 8.320 – 21.30<br>15.84; 16.20 | 22.10 – 30.40<br>26.25; 26.25 | NA                            | 10.10 – 14.80<br>11.93; 10.90 | 8.540 – 42.80<br>22.82; 23.15 | NA                            | NA                            | 67.90 – 151.0<br>115.2; 121.0  |

\* NA – not analysed.
